# Supplementary material
Source: Springer Nature journal article supplement (https://www.springermedizin.de/resource/supplementary/13058_2005_1278_MOESM2_ESM.pdf/9698736)

Cumulative Incidence of Breast Cancer by Weight at 30

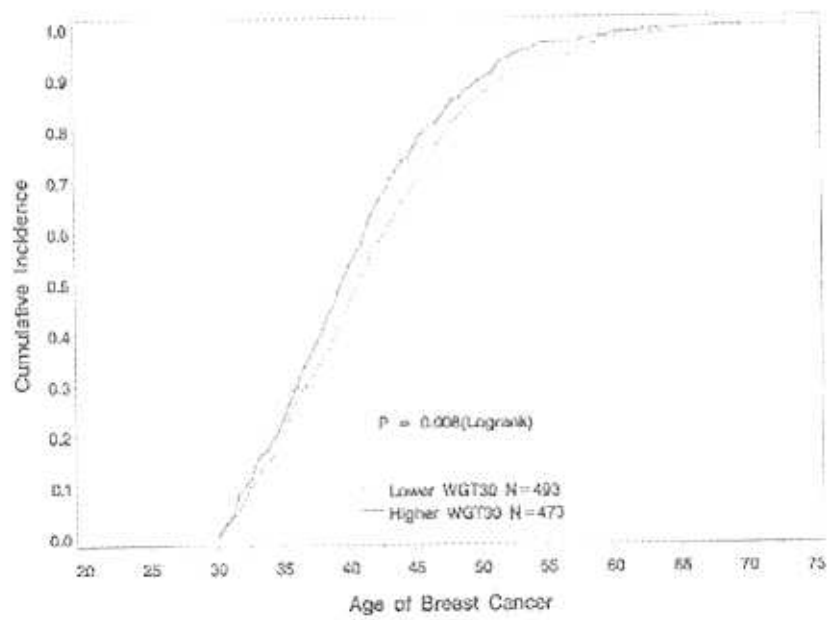

Supplement: MOESM2 [file 9698736]
